# Supplementary material for: A Na+ Superionic Conductor for Room-Temperature Sodium Batteries
Source: PubMed Central journal article supplement (PMC5004141; doi:10.1038/srep32330), 2016-08-30
Supplement: srep32330-s1.pdf [file srep32330-s1.pdf]

## **A Na<sup>+</sup> Superionic Conductor for Room-Temperature Sodium Batteries**

**Shufeng Song<sup>1,2</sup>, Hai M. Duong<sup>1</sup>, Alexander M. Korsunsky<sup>3</sup>, Ning Hu<sup>2</sup>, Li Lu<sup>1\*</sup>**

<sup>1</sup> Materials Science Group, Department of Mechanical Engineering National University of Singapore, Singapore 117575.

<sup>2</sup> College of Aerospace Engineering, Chongqing University, Chongqing 400044, P.R. China.

<sup>3</sup> Multi-Beam Laboratory for Engineering Microscopy (MBLEM), Department of Engineering Science, University of Oxford, Parks Road, Oxford OX1 3PJ, United Kingdom.

Correspondence and requests for materials should be addressed to L.L. (email: luli@nus.edu.sg).

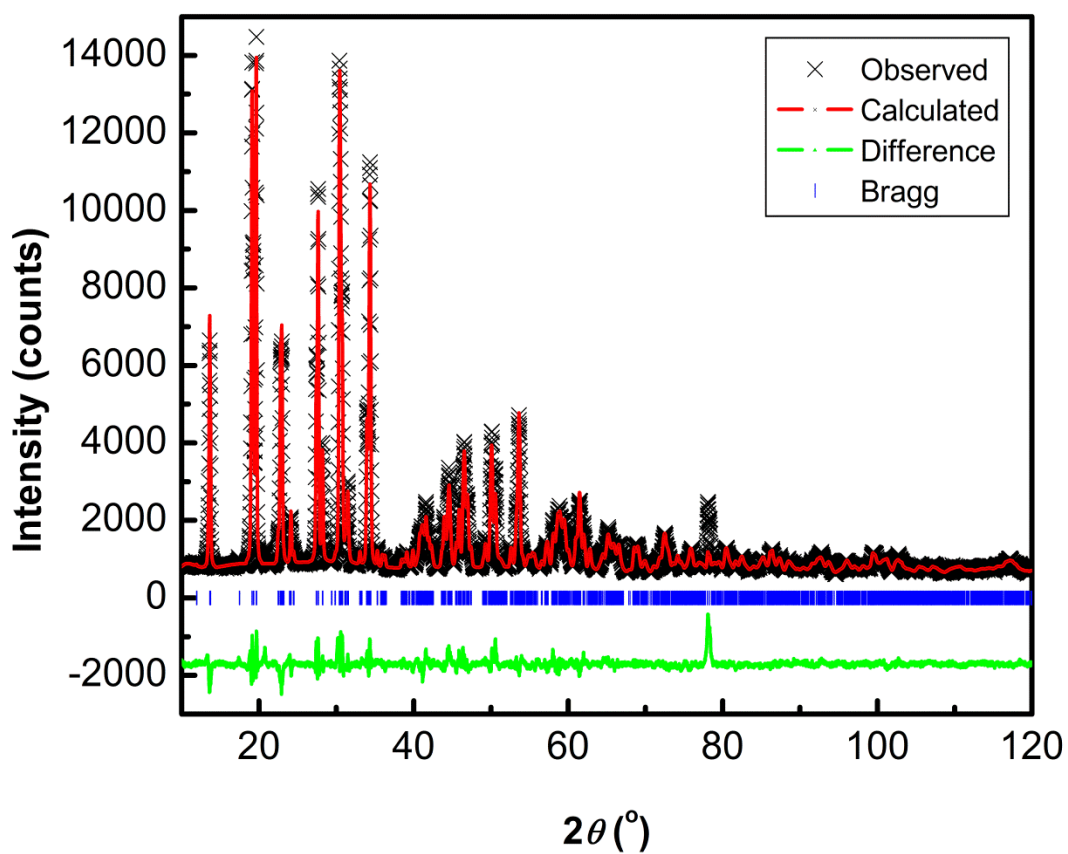

**Figure S1.** Rietveld refinement plots for the result of  $\text{Na}_{3.1}\text{Zr}_{1.95}\text{Mg}_{0.05}\text{Si}_2\text{PO}_{12}$  from powder XRD data. The observed pattern, calculated profile, difference curve and the ticks for the Bragg reflections are plotted.

**Table S1. Results of the refinements of the structural parameters for the  $\text{Na}_{3.1}\text{Zr}_{1.95}\text{Mg}_{0.05}\text{Si}_2\text{PO}_{12}$ .**

| Atom                                                                                                                 | Occupation | x          | y           | z          | $U_{iso}$ |
|----------------------------------------------------------------------------------------------------------------------|------------|------------|-------------|------------|-----------|
| Zr                                                                                                                   | 0.975      | 0.1011(83) | 0.2465(36)  | 0.0551(3)  | 0.023(55) |
| Mg                                                                                                                   | 0.025      | 0.7174(48) | -0.6058(96) | 1.9590(89) | 0.09      |
| P1                                                                                                                   | 0.5        | 0          | 0.0437(66)  | 0.25       | 0.107(61) |
| P2                                                                                                                   | 0.25       | 0.3645(53) | 0.0744(24)  | 0.2539(94) | 0.003(65) |
| Si1                                                                                                                  | 0.56       | 0          | 0.0366(75)  | 0.25       | 0.001(38) |
| Si2                                                                                                                  | 0.72       | 0.3550(82) | 0.1134(42)  | 0.2608(09) | 0.015(05) |
| Na1                                                                                                                  | 0.230(7)   | 0.25       | 0.25        | 0.5        | 0.077(64) |
| Na2                                                                                                                  | 1.0        | 0.5        | 0.8867(02)  | 0.25       | 0.019(89) |
| Na3                                                                                                                  | 0.934(6)   | 0.8172(9)  | 0.1118(46)  | 0.8763(76) | 0.205(44) |
| O1                                                                                                                   | 1.0        | 0.1438(26) | 0.4457(79)  | 0.2201(23) | 0.071(28) |
| O2                                                                                                                   | 1.0        | 0.4365(77) | 0.4412(99)  | 0.0839(59) | 0.037(81) |
| O3                                                                                                                   | 1.0        | 0.2603(09) | 0.1786(29)  | 0.2232(71) | 0.035(13) |
| O4                                                                                                                   | 1.0        | 0.3732(54) | 0.1329(17)  | 0.0954(66) | 0.030(66) |
| O5                                                                                                                   | 1.0        | 0.4418(45) | 0.1767(71)  | 0.4268(87) | 0.030(02) |
| O6                                                                                                                   | 1.0        | 0.0888(22) | 0.1476(99)  | 0.2506(79) | 0.010(25) |
| Agreement factors: $R_p=5.13\%$ , $R_{wp}=7.39\%$ , $\chi^2=6.749$                                                   |            |            |             |            |           |
| $a=15.6600(96) \text{ \AA}$ , $b=9.0613(93) \text{ \AA}$ , $c=9.2272(28) \text{ \AA}$ , $V=1089.17(6) \text{ \AA}^3$ |            |            |             |            |           |
| Phase weight fractions for phase no. 1 (NASICON): 0.946(25)                                                          |            |            |             |            |           |
| Phase weight fractions for phase no. 2 ( $\text{ZrO}_2$ ): 0.0537(54)                                                |            |            |             |            |           |

**Table S2. Results of the refinements of the structural parameters for the  $\text{Na}_{3.1}\text{Zr}_{1.95}\text{Ca}_{0.05}\text{Si}_2\text{PO}_{12}$ .**

| Atom                                                                                                                 | Occupation | x          | y          | z           | $U_{iso}$ |
|----------------------------------------------------------------------------------------------------------------------|------------|------------|------------|-------------|-----------|
| Zr                                                                                                                   | 0.975      | 0.1011(11) | 0.2483(44) | 0.0556(92)  | 0.025(58) |
| Ca                                                                                                                   | 0.025      | 0.1785(67) | 0.1051(71) | -0.2421(78) | 0.075(04) |
| P1                                                                                                                   | 0.5        | 0          | 0.0486(63) | 0.25        | 0.184(45) |
| P2                                                                                                                   | 0.25       | 0.3649(07) | 0.0773(62) | 0.2618(29)  | 0.033(82) |
| Si1                                                                                                                  | 0.476(1)   | 0          | 0.0268(71) | 0.25        | 0.007(58) |
| Si2                                                                                                                  | 0.762      | 0.3556(53) | 0.1113(54) | 0.2610(97)  | 0.020(98) |
| Na1                                                                                                                  | 0.230(7)   | 0.25       | 0.25       | 0.5         | 0.127(78) |
| Na2                                                                                                                  | 1.0        | 0.5        | 0.8927(49) | 0.25        | 0.016(95) |
| Na3                                                                                                                  | 0.934(6)   | 0.8158(58) | 0.1184(75) | 0.9049 (61) | 0.254(02) |
| O1                                                                                                                   | 1.0        | 0.1449(86) | 0.4325(38) | 0.2074(99)  | 0.113(62) |
| O2                                                                                                                   | 1.0        | 0.4399(25) | 0.4413(58) | 0.0744(92)  | 0.026(27) |
| O3                                                                                                                   | 1.0        | 0.2542(04) | 0.1797(75) | 0.2034(33)  | 0.012(67) |
| O4                                                                                                                   | 1.0        | 0.3756(15) | 0.1361(75) | 0.0911(97)  | 0.043(39) |
| O5                                                                                                                   | 1.0        | 0.4417(21) | 0.1832(91) | 0.4325(95)  | 0.050(25) |
| O6                                                                                                                   | 1.0        | 0.0865(52) | 0.1355(38) | 0.2485(83)  | 0.013(49) |
| Agreement factors: $R_p=5.21\%$ , $R_{wp}=6.92\%$ , $\chi^2=5.770$                                                   |            |            |            |             |           |
| $a=15.6671(42) \text{ \AA}$ , $b=9.0634(97) \text{ \AA}$ , $c=9.2282(29) \text{ \AA}$ , $V=1089.77(1) \text{ \AA}^3$ |            |            |            |             |           |
| Phase weight fractions for phase no. 1 (NASICON): 0.947(02)                                                          |            |            |            |             |           |
| Phase weight fractions for phase no. 2 ( $\text{ZrO}_2$ ): 0.0529(79)                                                |            |            |            |             |           |

**Table S3. Results of the refinements of the structural parameters for the  $\text{Na}_{3.1}\text{Zr}_{1.95}\text{Sr}_{0.05}\text{Si}_2\text{PO}_{12}$ .**

| Atom                                                                                                                 | Occupation | x          | y          | z           | $U_{iso}$ |
|----------------------------------------------------------------------------------------------------------------------|------------|------------|------------|-------------|-----------|
| Zr                                                                                                                   | 0.975      | 0.1010(18) | 0.2462(42) | 0.0560(05)  | 0.019(33) |
| Sr                                                                                                                   | 0.025      | 0.1853(31) | 0.0471(84) | -0.2503(61) | 0.029(99) |
| P1                                                                                                                   | 0.5        | 0          | 0.0450(11) | 0.25        | 0.061(71) |
| P2                                                                                                                   | 0.25       | 0.3645(99) | 0.0859(99) | 0.2576(64)  | 0.004     |
| Si1                                                                                                                  | 0.476(1)   | 0          | 0.0345(65) | 0.25        | 0.022(19) |
| Si2                                                                                                                  | 0.762      | 0.3566(59) | 0.1122(72) | 0.2608(59)  | 0.019(24) |
| Na1                                                                                                                  | 0.230(7)   | 0.25       | 0.25       | 0.5         | 0.081(65) |
| Na2                                                                                                                  | 1.0        | 0.5        | 0.8878(06) | 0.25        | 0.020(03) |
| Na3                                                                                                                  | 0.934(6)   | 0.8193(79) | 0.1201(13) | 0.9050(26)  | 0.229(74) |
| O1                                                                                                                   | 1.0        | 0.1406(03) | 0.4384(4)  | 0.2145(65)  | 0.053(4)  |
| O2                                                                                                                   | 1.0        | 0.4402(27) | 0.4435(04) | 0.0798(59)  | 0.021(59) |
| O3                                                                                                                   | 1.0        | 0.3716(62) | 0.1304(79) | 0.0943(25)  | 0.047(88) |
| O4                                                                                                                   | 1.0        | 0.3732(54) | 0.1329(17) | 0.0954(66)  | 0.022(45) |
| O5                                                                                                                   | 1.0        | 0.4473(42) | 0.1868(05) | 0.4363(9)   | 0.036(04) |
| O6                                                                                                                   | 1.0        | 0.0840(16) | 0.1481(2)  | 0.2455(87)  | 0.001(12) |
| Agreement factors: $R_p=5.06\%$ , $R_{wp}=7.04\%$ , $\chi^2=5.942$                                                   |            |            |            |             |           |
| $a=15.6623(36) \text{ \AA}$ , $b=9.0628(78) \text{ \AA}$ , $c=9.2289(32) \text{ \AA}$ , $V=1089.70(4) \text{ \AA}^3$ |            |            |            |             |           |
| Phase weight fractions for phase no. 1 (NASICON): 0.968(37)                                                          |            |            |            |             |           |
| Phase weight fractions for phase no. 2 ( $\text{ZrO}_2$ ): 0.0316(29)                                                |            |            |            |             |           |

**Table S4. Results of the refinements of the structural parameters for the  $\text{Na}_{3.1}\text{Zr}_{1.95}\text{Ba}_{0.05}\text{Si}_2\text{PO}_{12}$ .**

| Atom                                                                                                                 | Occupation | x          | y          | z           | $U_{iso}$ |
|----------------------------------------------------------------------------------------------------------------------|------------|------------|------------|-------------|-----------|
| Zr                                                                                                                   | 0.975      | 0.1012(35) | 0.2459(6)  | 0.0557(68)  | 0.021(21) |
| Ba                                                                                                                   | 0.025      | 0.1634(73) | 0.0826(31) | -0.3217(23) | 0.059     |
| P1                                                                                                                   | 0.5        | 0          | 0.0500(71) | 0.25        | 0.030(44) |
| P2                                                                                                                   | 0.25       | 0.3585(47) | 0.0961(38) | 0.2602(68)  | 0.002(06) |
| Si1                                                                                                                  | 0.56       | 0          | 0.0388(15) | 0.25        | 0.045     |
| Si2                                                                                                                  | 0.72       | 0.3569(76) | 0.1135(97) | 0.2600(21)  | 0.020(58) |
| Na1                                                                                                                  | 0.230(7)   | 0.25       | 0.25       | 0.5         | 0.104(86) |
| Na2                                                                                                                  | 1.0        | 0.5        | 0.8869(12) | 0.25        | 0.021(41) |
| Na3                                                                                                                  | 0.934(6)   | 0.8211(62) | 0.1186(17) | 0.9124(48)  | 0.220(02) |
| O1                                                                                                                   | 1.0        | 0.1384(08) | 0.4416(45) | 0.2108(82)  | 0.053(12) |
| O2                                                                                                                   | 1.0        | 0.4425     | 0.4418(19) | 0.0820(13)  | 0.024(17) |
| O3                                                                                                                   | 1.0        | 0.2572(79) | 0.1814(45) | 0.2141(64)  | 0.042(32) |
| O4                                                                                                                   | 1.0        | 0.3689(86) | 0.1314(08) | 0.0936(75)  | 0.018(35) |
| O5                                                                                                                   | 1.0        | 0.4466(76) | 0.1880(77) | 0.4347(48)  | 0.028(12) |
| O6                                                                                                                   | 1.0        | 0.0848(32) | 0.1498(73) | 0.2461(17)  | 0.001(38) |
| Agreement factors: $R_p=5.26\%$ , $R_{wp}=7.34\%$ , $\chi^2=6.453$                                                   |            |            |            |             |           |
| $a=15.6543(43) \text{ \AA}$ , $b=9.0581(51) \text{ \AA}$ , $c=9.2242(98) \text{ \AA}$ , $V=1088.03(6) \text{ \AA}^3$ |            |            |            |             |           |
| Phase weight fractions for phase no. 1 (NASICON): 0.967(55)                                                          |            |            |            |             |           |
| Phase weight fractions for phase no. 2 ( $\text{ZrO}_2$ ): 0.0324(49)                                                |            |            |            |             |           |
